# Supplementary material
Source: publisher site journal article supplement (https://www.dovepress.com/article/445636)

## ● **Supplementary material 1**

### **High-Performance Liquid Chromatography analysis of WTJD**

**Method:** The chemical characterization of WTJD was analyzed using the HPLC system (Shimadzu Corporation, LC-2030C3D, Japan). Accurately weighted 0.5 g of WTJD powder, and added 50 mL of 70% methanol. The sample was weighed, heated, and then refluxed for 30 min. Afterward, the mixture was placed for cooling, weighed, and then compensated for its reduced weight by adding 70% methanol. Afterward, the sample went through a 0.45  $\mu\text{m}$  microporous membrane. Subsequently, 10  $\mu\text{L}$  of the filtrate's supernatant was introduced into the HPLC system.

Chromatographic separations were performed using the Shimadzu InertSustain AQ-C18 (250 mm  $\times$  4.6 mm, 5  $\mu\text{m}$ ) column. The mobile phase system comprises acetonitrile (A) and 0.3% phosphoric acid solution (B). The flow rate, injection volume, column temperature, and detection wavelength are programmed at 1 mL/min, 5  $\mu\text{L}$ , 35  $^{\circ}\text{C}$ , and 240 nm, respectively. **Table** presents the gradient elution procedure.

Table. HPLC gradient elution procedure

| Time (min) | Mobile phase A (%) | Mobile phase B (%)  |
|------------|--------------------|---------------------|
| 0~20       | 7                  | 93                  |
| 20~50      | 7 $\rightarrow$ 20 | 93 $\rightarrow$ 80 |

Preparation of reference solution: The reference substance was precisely weighed and dissolved with methanol. Loganin and morroniside were set to a mass concentration of 50  $\mu\text{g}/\text{mL}$ ; Nystose was set to a mass concentration of 0.2 mg/mL; Curcumin was set to a mass concentration of 2 mg/mL. Subsequently, all reference substances were filtered by 0.22  $\mu\text{m}$  microporous membrane.

**Result:**

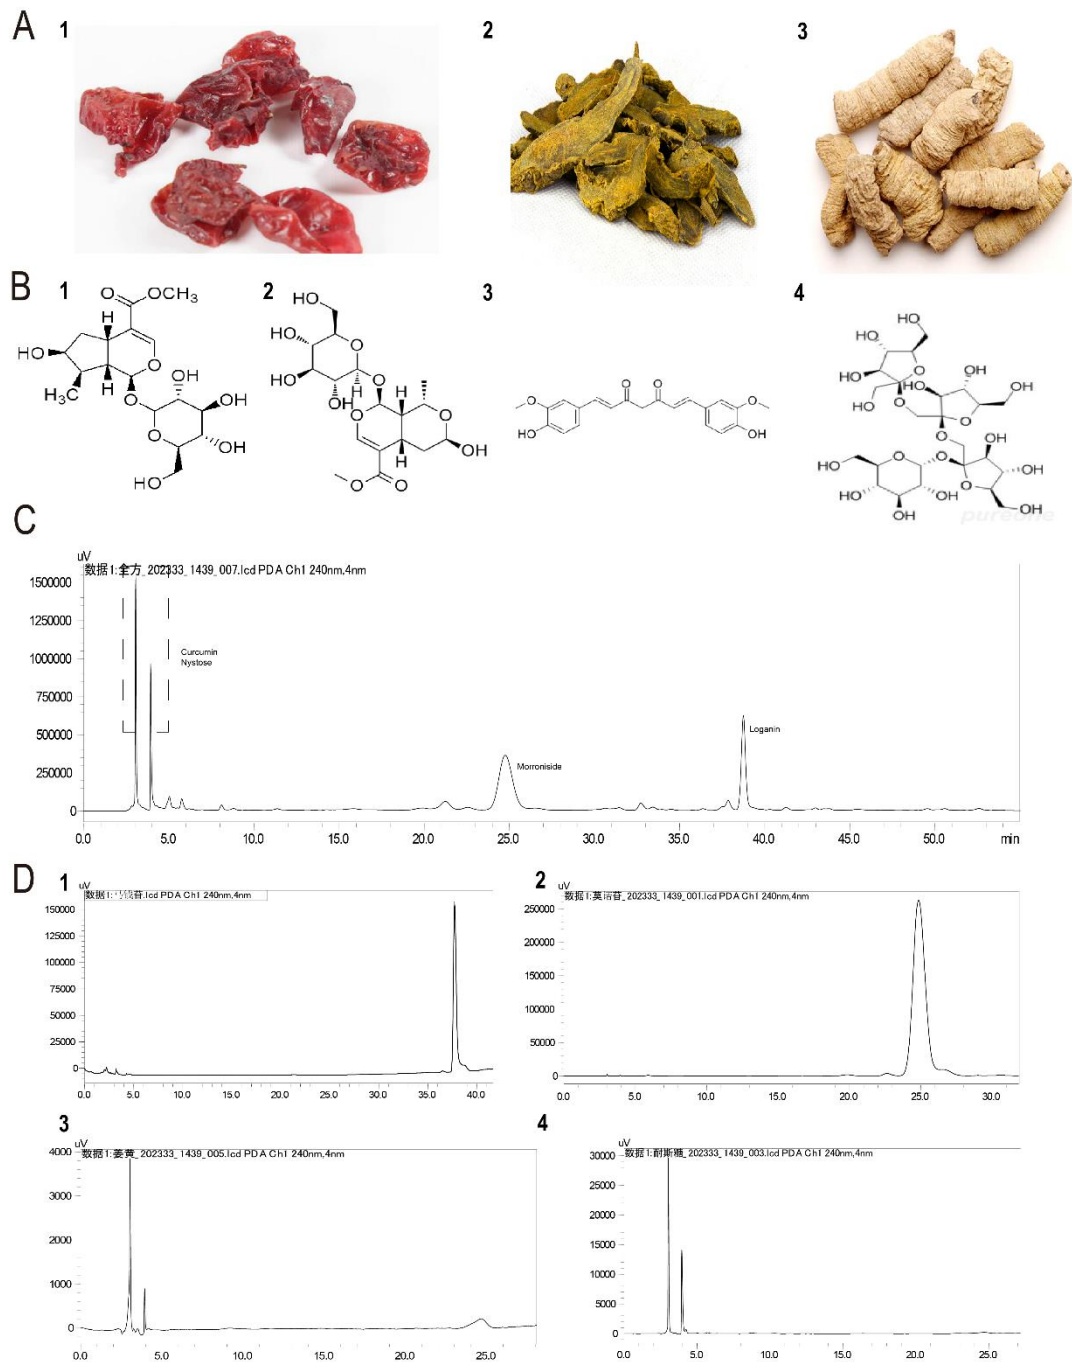

Figure. HPLC chromatography profiles of the major phytochemicals in WTJD. (A) The composition of WTJD: (1) Shanzhuyu; (2) Yujin; (3) Bajitian. (B) The structures of the major phytochemicals: (1) Loganin; (2) Morroniside; (3) Curcumin; (4) Nystose. (C) HPLC chromatogram of WTJD. (D) HPLC chromatograms of standards: (1) Loganin; (2) Morroniside; (3) Curcumin; (4) Nystose.

**Conclusion:** HPLC characterized the main chemical components of WTJD. Figure shows that the four main monomer components in WTJD were

identified based on the retention time of the standard: Loganin, Morroniside, Curcumin, and Nystose.

● **Supplementary material 2**

**Kidney yang deficiency pattern trait score table in rats**

|                                                                             |                                  | 0 score                             | 1 score                                                    | 2 scores                                              | 3 scores                                      |
|-----------------------------------------------------------------------------|----------------------------------|-------------------------------------|------------------------------------------------------------|-------------------------------------------------------|-----------------------------------------------|
| <b>Vital signs</b>                                                          | <b>Temperature (°C)</b>          | 38.5~39.5                           | 38.0~38.4                                                  | 37.5~37.9                                             | ≤37.4                                         |
|                                                                             | <b>Weight (g)</b>                | ≥300                                | 275~299                                                    | 250~274                                               | <250                                          |
| <b>Behavioral evaluation (5 min continuous observation, recording time)</b> | <b>Curl up and bend over (s)</b> | ≤30                                 | 31~149                                                     | 150~299                                               | 300                                           |
|                                                                             | <b>Get a bunch up (s)</b>        | ≤30                                 | 31~149                                                     | 150~299                                               | 300                                           |
| <b>Physical features</b>                                                    | <b>Auricle</b>                   | The color of the pinna is pale pink | The pinna is pale pink and clear blood vessels are visible | The pinna is pale and clear blood vessels are visible | The color of the pinna is white as paper      |
|                                                                             | <b>Claw armor</b>                | The claw nails are rosy and shiny   | The claw nails are pink and not soft                       | The claw armor is pale in color                       | The color of the claw armor is white as paper |
|                                                                             | <b>Tail color</b>                | The tail is pink                    | The tail is slightly whitish Color lines                   | The tail is pale white                                | The tail color is white paper                 |
|                                                                             | <b>Eyes</b>                      | The eyes are rosy and agile         | The eyes are red and slightly dull                         | The eyes are dull and faint, haggard                  | Squinting, lethargy                           |

|                           |                                                                                                                                                                                                          |                                                        |                                                                                  |                                                                                  |                                                     |
|---------------------------|----------------------------------------------------------------------------------------------------------------------------------------------------------------------------------------------------------|--------------------------------------------------------|----------------------------------------------------------------------------------|----------------------------------------------------------------------------------|-----------------------------------------------------|
|                           | <b>Tongue color</b>                                                                                                                                                                                      | Purple and red                                         | The color of the tongue darkened                                                 | The color of the tongue has become lighter                                       | The tongue is pale in color                         |
|                           | <b>Fluid on the tongue</b>                                                                                                                                                                               | Moisturizing the tongue                                | Tongue fluid slightly increased                                                  | The fluid on the surface of the tongue has increased, and it feels very slippery | The liquid on the tongue is about to drip down      |
|                           | <b>Densification of body hair</b>                                                                                                                                                                        | No change in body hair (uniform and fine distribution) | Loss of body hair (shedding body hair visible at the bottom of the cage)         | The body hair visible to the naked eye is fluffy and sparse                      | Local hair removal is severe                        |
|                           | <b>Body hair gloss</b>                                                                                                                                                                                   | Body hair is white and shiny and smooth                | The gloss of the body hair is reduced, and the white is interspersed with yellow | The body hair is dull, slightly messy, yellowish in color, and harder in texture | Body hair is very dull, dry, messy, yellow in color |
| <b>Pattern evaluation</b> | Overall score < 12: normal; Total score 12~16: mild kidney yang deficiency pattern; Total score 17~21: moderate kidney yang deficiency pattern; Total score > 22: Severe kidney yang deficiency pattern. |                                                        |                                                                                  |                                                                                  |                                                     |

● **Supplementary material 3**

**Instruction of Prestained Protein Marker II (10-200 kDa)**

## Servicebio® Prestained Protein Marker II (10-200 kDa)

目录号: G2058

### 产品信息

| 产品名称                                      | 产品编号        | 规格          |
|-------------------------------------------|-------------|-------------|
| Prestained Protein Marker II (10-200 kDa) | G2058-250UL | 250 $\mu$ L |

### 产品简介

本产品 Prestained Protein Marker II 由 10 种高纯度并预染的重组蛋白质组成, 在 Tris-Glycine gel 中指示分子量范围为 10-200 kDa (~10、~18、~23、~30、~42、~55、~75、~110、~140、~200 kDa), 其中 75 kDa 为橙红色条带, 10 kDa 为玫红色条带, 其他均为蓝色条带, 方便动态观察蛋白质电泳状态或判断蛋白质转膜效果。适合作为 SDS-PAGE 和 Western blot 的蛋白质分子量标准。

### 储存与运输

冰袋 (wet ice) 运输; -20°C 保存, 12 个月有效。

### 组成

| Component Number | Component                    | G2058-250UL |
|------------------|------------------------------|-------------|
| G2058            | Prestained Protein Marker II | 250 $\mu$ L |
|                  | 说明书                          | 1 份         |

### 操作步骤

1. 本产品为即用型, 无需加入还原剂或加热。取 -20°C 保存的 Prestained Protein Marker 于室温下解冻后轻轻充分混匀;
2. 取本产品 3-10  $\mu$ L 与实验样品同时进行蛋白电泳; 建议有条件的实验室在初次使用本产品时可以根据自身的实验条件和实验习惯通过预实验确定合适的上样量, 这样既可以节约成本, 同时也可获得效果更佳的实验图片;
3. Prestained Protein Marker 使用完后及时保存于 -20°C (建议 5-10  $\mu$ L 分装保存使用)。

### 注意事项

1. 本预染蛋白分子量标准不能 100°C 加热或者煮沸, 加热或煮沸会导致蛋白条带发生降解或脱色。
2. 若使用抗 his 标签抗体, 不建议使用本产品。
3. 大分子量蛋白 Western blot 时需要延长转膜时间或升高转膜电压。
4. 图中参考预染蛋白分子量大小是根据非预染蛋白分子量进行标定。
5. 为了您的安全和健康, 请穿实验服并戴一次性手套操作。

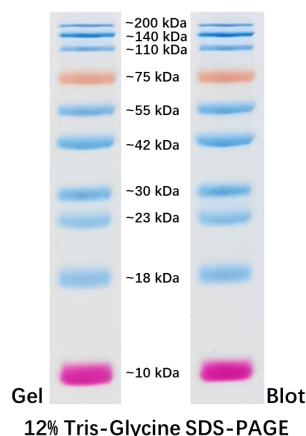

图 1. Prestained Protein Marker II 参考分子量大小

产品仅供科研用途, 不用于临床诊断!

## Servicebio® Prestained Protein Marker II (10-200 kDa)

Catalog number: G2058

### Product information

| Product name                              | Product number | Specifications |
|-------------------------------------------|----------------|----------------|
| Prestained Protein Marker II (10-200 kDa) | G2058-250UL    | 250 $\mu$ L    |

### Product briefing:

The product Prestained Protein Marker II consists of 10 highly purified and pre-stained recombinant proteins in Tris-Glycine gel. The molecular weight range is 10-200kDa ( ~ 10, ~ 18, ~ 23, ~ 30, ~ 42, ~ 55, ~ 75, ~ 110, ~ 140, ~ 200kDa ). The 75 kDa was orange red band, the 10 kDa was rose red band, and the others were blue bands, which was convenient for dynamic observation of protein electrophoresis status or judgment.

### Storage and transportation :

Ice bag ( wetice ) transport ; stored at-20 °C for 12 months.

### Component:

| Component Number | Component                                 | G2058-250UL |
|------------------|-------------------------------------------|-------------|
| G2058            | Prestained Protein Marker II (10-200 kDa) | 250 $\mu$ L |
| Specification    |                                           | 1 sample    |

### Operation steps:

1.This product is ready-to-use, no need to add reducing agent or heating. Prestained Protein Marker stored at -20 °C was thawed at room temperature and then gently and fully mixed.

2.Take 3-10 $\mu$ L of this product and the experimental sample for protein electrophoresis at the same time ; it is suggested that conditional laboratories can determine the appropriate loading amount through pre-experiment according to their own experimental conditions and experimental habits when using this product for the first time, which can not only save costs, but also obtain better

experimental pictures .

3. Prestained Protein Marker is stored at -20 °C in time after use ( 5-10µL is recommended for storage ).

**Precautions:**

1. This prestained protein ladder cannot be heated or boiled at 100°C, as heating or boiling will cause degradation or decolorization of protein bands.
2. This product is not recommended if anti-HIS-tag antibody is used.
3. In Westernblot, large molecular weight proteins need to extend the transfer time or increase the transfer voltage.
4. The molecular weight of the reference prestained protein in the figure is calibrated according to the molecular weight of the unstained protein.
5. For your safety and health, please wear a lab coat and disposable gloves to operate.

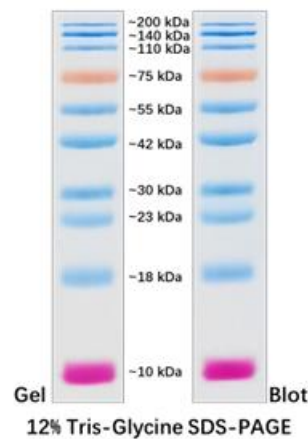

Figure. Prestained Protein Marker II Reference Molecular Weight

**●Supplementary material 4**  
**Western blot raw data**

| Grayscale value                                                   |         |          |               |          |             |          |               |          |               |          |               |  |
|-------------------------------------------------------------------|---------|----------|---------------|----------|-------------|----------|---------------|----------|---------------|----------|---------------|--|
|                                                                   | No.     |          | GAPDH<br>36KD |          | ROR<br>54KD |          | FOXP3<br>54KD |          | T-BET<br>58KD |          | GATA3<br>47KD |  |
| Hippocampus tissues                                               | C1      | 1        | 24739.49      | 1        | 4858.69     | 1        | 28551.85      | 1        | 8971.933      | 1        | 27021.32      |  |
|                                                                   | M1      | 2        | 25071.49      | 2        | 25788.66    | 2        | 18868.13      | 2        | 27701.63      | 2        | 6423.761      |  |
|                                                                   | F1      | 3        | 25243.44      | 3        | 21364.42    | 3        | 21571.49      | 3        | 22557.32      | 3        | 9953.418      |  |
|                                                                   | WTJD-H1 | 4        | 27376.73      | 4        | 14521.64    | 4        | 22704.61      | 4        | 15017.47      | 4        | 20103.37      |  |
|                                                                   | WTJD-M1 | 5        | 25218.61      | 5        | 17928.42    | 5        | 22842.49      | 5        | 15644.37      | 5        | 17476.61      |  |
|                                                                   |         |          |               |          |             |          |               |          |               |          |               |  |
|                                                                   | C2      | 1        | 23421         | 1        | 14625.88    | 1        | 29452.02      | 1        | 11627.75      | 1        | 26954.15      |  |
|                                                                   | M2      | 2        | 24037.44      | 2        | 28426.44    | 2        | 15514.08      | 2        | 24644.49      | 2        | 5903.225      |  |
|                                                                   | F2      | 3        | 25305.08      | 3        | 24006.32    | 3        | 17490.9       | 3        | 19684.54      | 3        | 12580.54      |  |
|                                                                   | WTJD-H2 | 4        | 24400.59      | 4        | 19236.54    | 4        | 17928.49      | 4        | 15232.76      | 4        | 20190.9       |  |
|                                                                   | WTJD-M2 | 5        | 23894.35      | 5        | 24067.37    | 5        | 15697.61      | 5        | 21223.54      | 5        | 16401.66      |  |
|                                                                   |         |          |               |          |             |          |               |          |               |          |               |  |
|                                                                   | C3      | 1        | 23339.25      | 1        | 7546.974    | 1        | 24667.61      | 1        | 8106.397      | 1        | 23115.15      |  |
|                                                                   | M3      | 2        | 24456.2       | 2        | 35103.58    | 2        | 13271.54      | 2        | 24169.13      | 2        | 9842.296      |  |
|                                                                   | F3      | 3        | 25460.44      | 3        | 26721.48    | 3        | 14317.25      | 3        | 21077.65      | 3        | 15019.78      |  |
|                                                                   | WTJD-H3 | 4        | 26370.49      | 4        | 18426.27    | 4        | 23582.78      | 4        | 16569.82      | 4        | 20508.94      |  |
|                                                                   | WTJD-M3 | 5        | 25848.9       | 5        | 27115.97    | 5        | 21252.95      | 5        | 18563.41      | 5        | 17685.08      |  |
|                                                                   |         |          |               |          |             |          |               |          |               |          |               |  |
|                                                                   | C4      | 1        | 23458.42      | 1        | 3305.134    | 1        | 26726.85      | 1        | 17010.66      | 1        | 21169.15      |  |
|                                                                   | M4      | 2        | 24808.9       | 2        | 33410.89    | 2        | 6590.054      | 2        | 27801.56      | 2        | 5664.175      |  |
| F4                                                                | 3       | 25974.15 | 3             | 25233.61 | 3           | 11958.37 | 3             | 26225.9  | 3             | 14011.37 |               |  |
| WTJD-H4                                                           | 4       | 24962.02 | 4             | 15739.71 | 4           | 26222.44 | 4             | 15897.83 | 4             | 18520.43 |               |  |
| WTJD-M4                                                           | 5       | 23888.2  | 5             | 25601.2  | 5           | 17034.78 | 5             | 18881.66 | 5             | 16108.39 |               |  |
|                                                                   |         |          |               |          |             |          |               |          |               |          |               |  |
| Gray value of target protein/grayscale value of reference protein |         |          |               |          |             |          |               |          |               |          |               |  |
|                                                                   | No.     |          | GAPDH<br>36KD |          | ROR<br>54KD |          | FOXP3<br>54KD |          | T-BET<br>58KD |          | GATA3<br>47KD |  |
| Hippocampus tissues                                               | C1      |          | 1             |          | 0.196394    |          | 1.1541        |          | 0.362656      |          | 1.092234      |  |
|                                                                   | M1      |          | 1             |          | 1.028605    |          | 0.752573      |          | 1.104906      |          | 0.256218      |  |
|                                                                   | F1      |          | 1             |          | 0.846335    |          | 0.854538      |          | 0.893591      |          | 0.394297      |  |
|                                                                   | WTJD-H1 |          | 1             |          | 0.530437    |          | 0.82934       |          | 0.548549      |          | 0.734323      |  |
|                                                                   | WTJD-M1 |          | 1             |          | 0.71092     |          | 0.905779      |          | 0.62035       |          | 0.693004      |  |
|                                                                   |         |          |               |          |             |          |               |          |               |          |               |  |
|                                                                   | C2      |          | 1             |          | 0.624477    |          | 1.257505      |          | 0.496467      |          | 1.150854      |  |
|                                                                   | M2      |          | 1             |          | 1.18259     |          | 0.645413      |          | 1.025254      |          | 0.245585      |  |
|                                                                   | F2      |          | 1             |          | 0.948676    |          | 0.691201      |          | 0.777889      |          | 0.497155      |  |
|                                                                   | WTJD-H2 |          | 1             |          | 0.788364    |          | 0.734756      |          | 0.624278      |          | 0.827476      |  |
|                                                                   | WTJD-M2 |          | 1             |          | 1.007241    |          | 0.656959      |          | 0.888224      |          | 0.686424      |  |
|                                                                   |         |          |               |          |             |          |               |          |               |          |               |  |
|                                                                   | C3      |          | 1             |          | 0.32336     |          | 1.056915      |          | 0.347329      |          | 0.990398      |  |
|                                                                   | M3      |          | 1             |          | 1.435366    |          | 0.542666      |          | 0.988262      |          | 0.402446      |  |
|                                                                   | F3      |          | 1             |          | 1.049529    |          | 0.562333      |          | 0.827859      |          | 0.589926      |  |
|                                                                   | WTJD-H3 |          | 1             |          | 0.698746    |          | 0.894287      |          | 0.628347      |          | 0.777723      |  |
|                                                                   | WTJD-M3 |          | 1             |          | 1.049018    |          | 0.822199      |          | 0.718151      |          | 0.684171      |  |
|                                                                   |         |          |               |          |             |          |               |          |               |          |               |  |
|                                                                   | C4      |          | 1             |          | 0.140893    |          | 1.139329      |          | 0.725141      |          | 0.902411      |  |
|                                                                   | M4      |          | 1             |          | 1.34673     |          | 0.265633      |          | 1.120628      |          | 0.228312      |  |
| F4                                                                |         | 1        |               | 0.971489 |             | 0.460395 |               | 1.009693 |               | 0.539435 |               |  |
| WTJD-H4                                                           |         | 1        |               | 0.630546 |             | 1.050493 |               | 0.636881 |               | 0.741944 |               |  |
| WTJD-M4                                                           |         | 1        |               | 1.071709 |             | 0.713105 |               | 0.790418 |               | 0.674324 |               |  |



## RORyt

| <b>Tukey multiple comparisons test</b> | <b>Mean Diff.</b> | <b>95.00% CI of diff.</b> | <b>Significant?</b> | <b>Summary</b>     | <b>Adjusted P Value</b> |           |          |           |
|----------------------------------------|-------------------|---------------------------|---------------------|--------------------|-------------------------|-----------|----------|-----------|
| Normal vs. Model                       | -0.927            | -1.274 to -0.5801         | Yes                 | ****               | <0.0001                 | A-B       |          |           |
| Normal vs. Fluoxetine                  | -0.6327           | -0.9797 to -0.2858        | Yes                 | ***                | 0.0004                  | A-C       |          |           |
| Normal vs. WTJD-M                      | -0.6384           | -0.9854 to -0.2915        | Yes                 | ***                | 0.0004                  | A-D       |          |           |
| Normal vs. WTJD-H                      | -0.3407           | -0.6877 to 0.006187       | No                  | ns                 | 0.0554                  | A-E       |          |           |
| Model vs. Fluoxetine                   | 0.2943            | -0.05261 to 0.6412        | No                  | ns                 | 0.1164                  | B-C       |          |           |
| Model vs. WTJD-M                       | 0.2886            | -0.05833 to 0.6355        | No                  | ns                 | 0.1271                  | B-D       |          |           |
| Model vs. WTJD-H                       | 0.5863            | 0.2394 to 0.9332          | Yes                 | ***                | 0.0008                  | B-E       |          |           |
| Fluoxetine vs. WTJD-M                  | -0.005715         | -0.3526 to 0.3412         | No                  | ns                 | >0.9999                 | C-D       |          |           |
| Fluoxetine vs. WTJD-H                  | 0.292             | -0.05494 to 0.6389        | No                  | ns                 | 0.1207                  | C-E       |          |           |
| WTJD-M vs. WTJD-H                      | 0.2977            | -0.04923 to 0.6446        | No                  | ns                 | 0.1105                  | D-E       |          |           |
| <b>Test details</b>                    | <b>Mean1</b>      | <b>Mean 2</b>             | <b>Mean Diff.</b>   | <b>SE of diff.</b> | <b>n1</b>               | <b>n2</b> | <b>q</b> | <b>DF</b> |
| Normal vs. Model                       | 0.3213            | 1.248                     | -0.927              | 0.1124             | 4                       | 4         | 11.67    | 15        |
| Normal vs. Fluoxetine                  | 0.3213            | 0.954                     | -0.6327             | 0.1124             | 4                       | 4         | 7.964    | 15        |
| Normal vs. WTJD-M                      | 0.3213            | 0.9597                    | -0.6384             | 0.1124             | 4                       | 4         | 8.036    | 15        |
| Normal vs. WTJD-H                      | 0.3213            | 0.662                     | -0.3407             | 0.1124             | 4                       | 4         | 4.289    | 15        |
| Model vs. Fluoxetine                   | 1.248             | 0.954                     | 0.2943              | 0.1124             | 4                       | 4         | 3.705    | 15        |
| Model vs. WTJD-M                       | 1.248             | 0.9597                    | 0.2886              | 0.1124             | 4                       | 4         | 3.633    | 15        |
| Model vs. WTJD-H                       | 1.248             | 0.662                     | 0.5863              | 0.1124             | 4                       | 4         | 7.38     | 15        |
| Fluoxetine vs. WTJD-M                  | 0.954             | 0.9597                    | -0.005715           | 0.1124             | 4                       | 4         | 0.07193  | 15        |
| Fluoxetine vs. WTJD-H                  | 0.954             | 0.662                     | 0.292               | 0.1124             | 4                       | 4         | 3.675    | 15        |
| WTJD-M vs. WTJD-H                      | 0.9597            | 0.662                     | 0.2977              | 0.1124             | 4                       | 4         | 3.747    | 15        |

## FOXP3

| <b>Tukey multiple comparisons test</b> | <b>Mean Diff.</b> | <b>95.00% CI of diff.</b> | <b>Significant?</b> | <b>Summary</b> | <b>Adjusted P Value</b> |     |
|----------------------------------------|-------------------|---------------------------|---------------------|----------------|-------------------------|-----|
| Normal vs. Model                       | 0.6004            | 0.2774 to 0.9234          | Yes                 | ***            | 0.0003                  | A-B |
| Normal vs. Fluoxetine                  | 0.5098            | 0.1868 to 0.8329          | Yes                 | **             | 0.0016                  | A-C |
| Normal vs. WTJD-M                      | 0.3775            | 0.05442 to 0.7005         | Yes                 | *              | 0.0186                  | A-D |
| Normal vs. WTJD-H                      | 0.2747            | -0.04829 to 0.5978        | No                  | ns             | 0.1151                  | A-E |
| Model vs. Fluoxetine                   | -0.09055          | -0.4136 to 0.2325         | No                  | ns             | 0.905                   | B-C |
| Model vs. WTJD-M                       | -0.2229           | -0.5460 to 0.1001         | No                  | ns             | 0.2577                  | B-D |
| Model vs. WTJD-H                       | -0.3256           | -0.6487 to -0.002617      | Yes                 | *              | 0.0477                  | B-E |
| Fluoxetine vs. WTJD-M                  | -0.1324           | -0.4554 to 0.1906         | No                  | ns             | 0.7149                  | C-D |
| Fluoxetine vs. WTJD-H                  | -0.2351           | -0.5581 to 0.08793        | No                  | ns             | 0.2156                  | C-E |
| WTJD-M vs. WTJD-H                      | -0.1027           | -0.4257 to 0.2203         | No                  | ns             | 0.8593                  | D-E |

| <b>Test details</b>   | <b>Mean1</b> | <b>Mean 2</b> | <b>Mean Diff.</b> | <b>SE of diff.</b> | <b>n1</b> | <b>n2</b> | <b>q</b> | <b>DF</b> |
|-----------------------|--------------|---------------|-------------------|--------------------|-----------|-----------|----------|-----------|
| Normal vs. Model      | 1.152        | 0.5516        | 0.6004            | 0.1046             | 4         | 4         | 8.117    | 15        |
| Normal vs. Fluoxetine | 1.152        | 0.6421        | 0.5098            | 0.1046             | 4         | 4         | 6.892    | 15        |
| Normal vs. WTJD-M     | 1.152        | 0.7745        | 0.3775            | 0.1046             | 4         | 4         | 5.103    | 15        |
| Normal vs. WTJD-H     | 1.152        | 0.8772        | 0.2747            | 0.1046             | 4         | 4         | 3.714    | 15        |
| Model vs. Fluoxetine  | 0.5516       | 0.6421        | -0.09055          | 0.1046             | 4         | 4         | 1.224    | 15        |
| Model vs. WTJD-M      | 0.5516       | 0.7745        | -0.2229           | 0.1046             | 4         | 4         | 3.014    | 15        |
| Model vs. WTJD-H      | 0.5516       | 0.8772        | -0.3256           | 0.1046             | 4         | 4         | 4.402    | 15        |
| Fluoxetine vs. WTJD-M | 0.6421       | 0.7745        | -0.1324           | 0.1046             | 4         | 4         | 1.79     | 15        |
| Fluoxetine vs. WTJD-H | 0.6421       | 0.8772        | -0.2351           | 0.1046             | 4         | 4         | 3.178    | 15        |
| WTJD-M vs. WTJD-H     | 0.7745       | 0.8772        | -0.1027           | 0.1046             | 4         | 4         | 1.388    | 15        |

T-bet

| <b>Tukey multiple comparisons test</b> | <b>Mean Diff.</b> | <b>95.00% CI of diff.</b> | <b>Significant?</b> | <b>Summary</b> | <b>Adjusted P Value</b> |     |
|----------------------------------------|-------------------|---------------------------|---------------------|----------------|-------------------------|-----|
| Normal vs. Model                       | -0.5769           | -0.8143 to -0.3394        | Yes                 | ****           | <0.0001                 | A-B |
| Normal vs. Fluoxetine                  | -0.3944           | -0.6318 to -0.1569        | Yes                 | ***            | 0.001                   | A-C |
| Normal vs. WTJD-M                      | -0.2714           | -0.5088 to -0.03393       | Yes                 | *              | 0.0216                  | A-D |
| Normal vs. WTJD-H                      | -0.1266           | -0.3641 to 0.1108         | No                  | ns             | 0.4927                  | A-E |
| Model vs. Fluoxetine                   | 0.1825            | -0.05495 to 0.4200        | No                  | ns             | 0.1762                  | B-C |
| Model vs. WTJD-M                       | 0.3055            | 0.06802 to 0.5429         | Yes                 | **             | 0.0092                  | B-D |
| Model vs. WTJD-H                       | 0.4502            | 0.2128 to 0.6877          | Yes                 | ***            | 0.0003                  | B-E |
| Fluoxetine vs. WTJD-M                  | 0.123             | -0.1145 to 0.3604         | No                  | ns             | 0.5198                  | C-D |
| Fluoxetine vs. WTJD-H                  | 0.2677            | 0.03029 to 0.5052         | Yes                 | *              | 0.0237                  | C-E |
| WTJD-M vs. WTJD-H                      | 0.1448            | -0.09268 to 0.3822        | No                  | ns             | 0.367                   | D-E |

| <b>Test details</b>   | <b>Mean1</b> | <b>Mean 2</b> | <b>Mean Diff.</b> | <b>SE of diff.</b> | <b>n1</b> | <b>n2</b> | <b>q</b> | <b>DF</b> |
|-----------------------|--------------|---------------|-------------------|--------------------|-----------|-----------|----------|-----------|
| Normal vs. Model      | 0.4829       | 1.06          | -0.5769           | 0.0769             | 4         | 4         | 10.61    | 15        |
| Normal vs. Fluoxetine | 0.4829       | 0.8773        | -0.3944           | 0.0769             | 4         | 4         | 7.253    | 15        |
| Normal vs. WTJD-M     | 0.4829       | 0.7543        | -0.2714           | 0.0769             | 4         | 4         | 4.991    | 15        |
| Normal vs. WTJD-H     | 0.4829       | 0.6095        | -0.1266           | 0.0769             | 4         | 4         | 2.329    | 15        |
| Model vs. Fluoxetine  | 1.06         | 0.8773        | 0.1825            | 0.0769             | 4         | 4         | 3.356    | 15        |
| Model vs. WTJD-M      | 1.06         | 0.7543        | 0.3055            | 0.0769             | 4         | 4         | 5.618    | 15        |
| Model vs. WTJD-H      | 1.06         | 0.6095        | 0.4502            | 0.0769             | 4         | 4         | 8.28     | 15        |
| Fluoxetine vs. WTJD-M | 0.8773       | 0.7543        | 0.123             | 0.0769             | 4         | 4         | 2.262    | 15        |
| Fluoxetine vs. WTJD-H | 0.8773       | 0.6095        | 0.2677            | 0.0769             | 4         | 4         | 4.924    | 15        |
| WTJD-M vs. WTJD-H     | 0.7543       | 0.6095        | 0.1448            | 0.0769             | 4         | 4         | 2.662    | 15        |

## GATA3

| <b>Tukey multiple comparisons test</b> | <b>Mean Diff.</b> | <b>95.00% CI of diff.</b> | <b>Significant?</b> | <b>Summary</b> | <b>Adjusted P Value</b> |     |
|----------------------------------------|-------------------|---------------------------|---------------------|----------------|-------------------------|-----|
| Normal vs. Model                       | 0.7508            | 0.5894 to 0.9122          | Yes                 | ****           | <0.0001                 | A-B |
| Normal vs. Fluoxetine                  | 0.5288            | 0.3674 to 0.6902          | Yes                 | ****           | <0.0001                 | A-C |
| Normal vs. WTJD-M                      | 0.3495            | 0.1881 to 0.5109          | Yes                 | ****           | <0.0001                 | A-D |
| Normal vs. WTJD-H                      | 0.2636            | 0.1022 to 0.4250          | Yes                 | **             | 0.0012                  | A-E |
| Model vs. Fluoxetine                   | -0.2221           | -0.3835 to -0.06067       | Yes                 | **             | 0.0054                  | B-C |
| Model vs. WTJD-M                       | -0.4013           | -0.5627 to -0.2399        | Yes                 | ****           | <0.0001                 | B-D |
| Model vs. WTJD-H                       | -0.4872           | -0.6486 to -0.3258        | Yes                 | ****           | <0.0001                 | B-E |
| Fluoxetine vs. WTJD-M                  | -0.1793           | -0.3407 to -0.01788       | Yes                 | *              | 0.0262                  | C-D |
| Fluoxetine vs. WTJD-H                  | -0.2652           | -0.4266 to -0.1038        | Yes                 | **             | 0.0011                  | C-E |
| WTJD-M vs. WTJD-H                      | -0.08589          | -0.2473 to 0.07551        | No                  | ns             | 0.4946                  | D-E |

| <b>Test details</b>   | <b>Mean1</b> | <b>Mean 2</b> | <b>Mean Diff.</b> | <b>SE of diff.</b> | <b>n1</b> | <b>n2</b> | <b>q</b> | <b>DF</b> |
|-----------------------|--------------|---------------|-------------------|--------------------|-----------|-----------|----------|-----------|
| Normal vs. Model      | 1.034        | 0.2831        | 0.7508            | 0.05227            | 4         | 4         | 20.32    | 15        |
| Normal vs. Fluoxetine | 1.034        | 0.5052        | 0.5288            | 0.05227            | 4         | 4         | 14.31    | 15        |
| Normal vs. WTJD-M     | 1.034        | 0.6845        | 0.3495            | 0.05227            | 4         | 4         | 9.456    | 15        |
| Normal vs. WTJD-H     | 1.034        | 0.7704        | 0.2636            | 0.05227            | 4         | 4         | 7.133    | 15        |
| Model vs. Fluoxetine  | 0.2831       | 0.5052        | -0.2221           | 0.05227            | 4         | 4         | 6.008    | 15        |
| Model vs. WTJD-M      | 0.2831       | 0.6845        | -0.4013           | 0.05227            | 4         | 4         | 10.86    | 15        |
| Model vs. WTJD-H      | 0.2831       | 0.7704        | -0.4872           | 0.05227            | 4         | 4         | 13.18    | 15        |
| Fluoxetine vs. WTJD-M | 0.5052       | 0.6845        | -0.1793           | 0.05227            | 4         | 4         | 4.851    | 15        |
| Fluoxetine vs. WTJD-H | 0.5052       | 0.7704        | -0.2652           | 0.05227            | 4         | 4         | 7.175    | 15        |
| WTJD-M vs. WTJD-H     | 0.6845       | 0.7704        | -0.08589          | 0.05227            | 4         | 4         | 2.324    | 15        |

## Supplementary material 5

Western blot pictures

### FOXP3

1.(For the Figure 5)

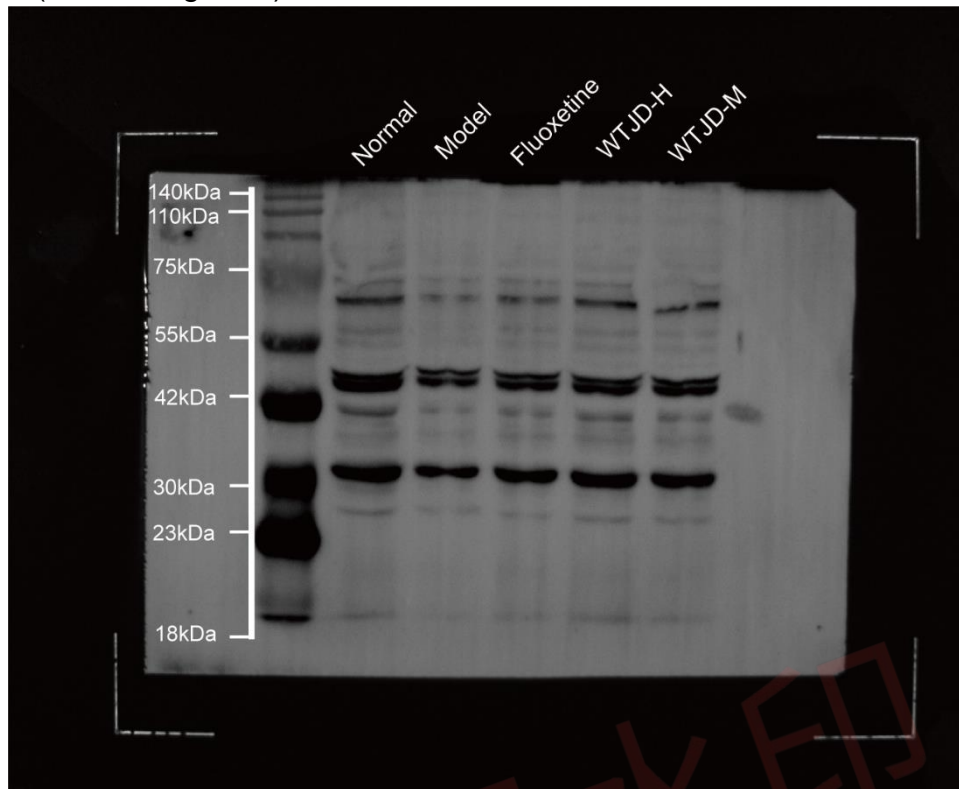

2.

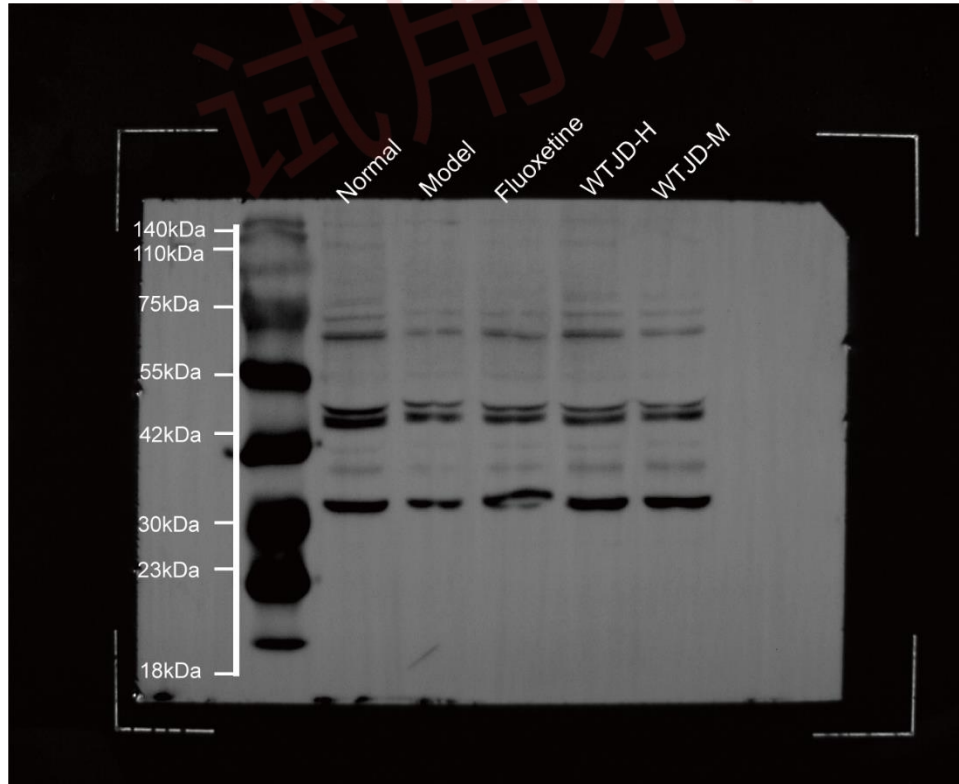

3.

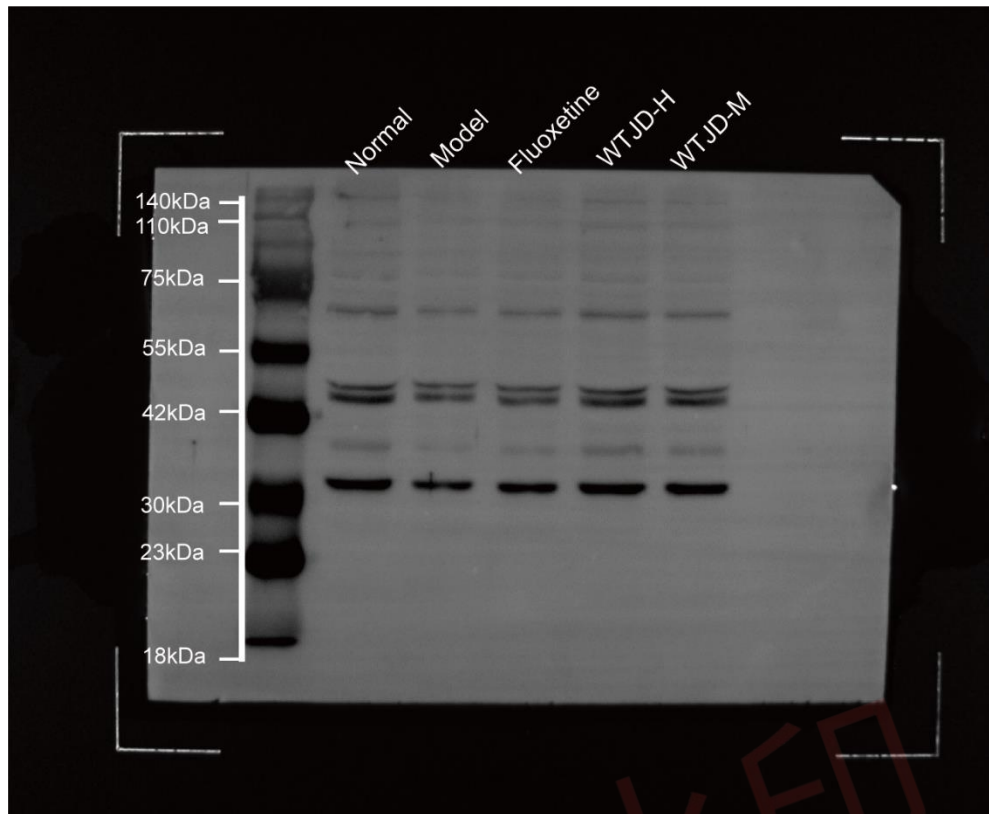

4.

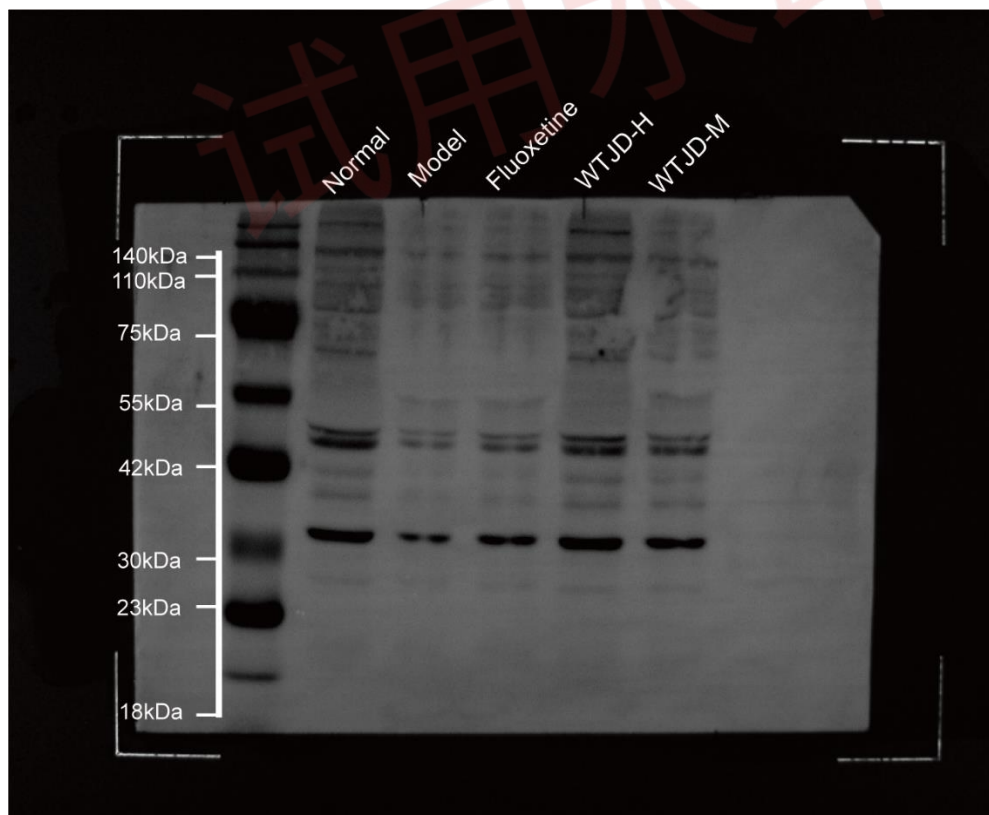

# GAPDH

1.(For the Figure 5A)

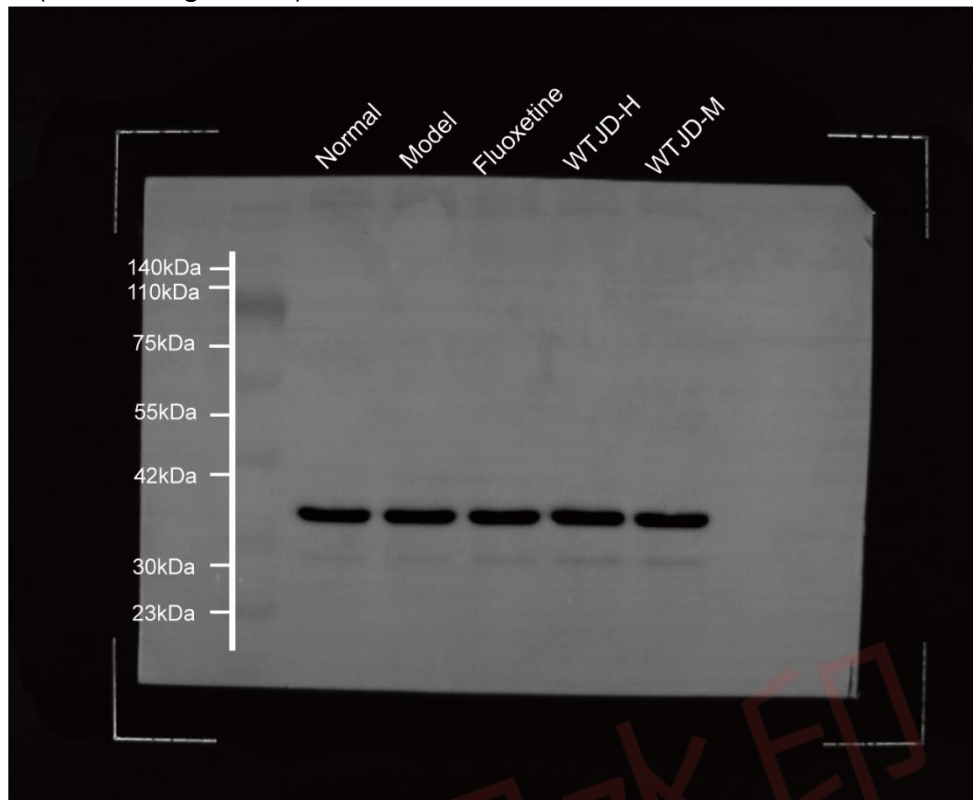

2.(For the Figure 5B)

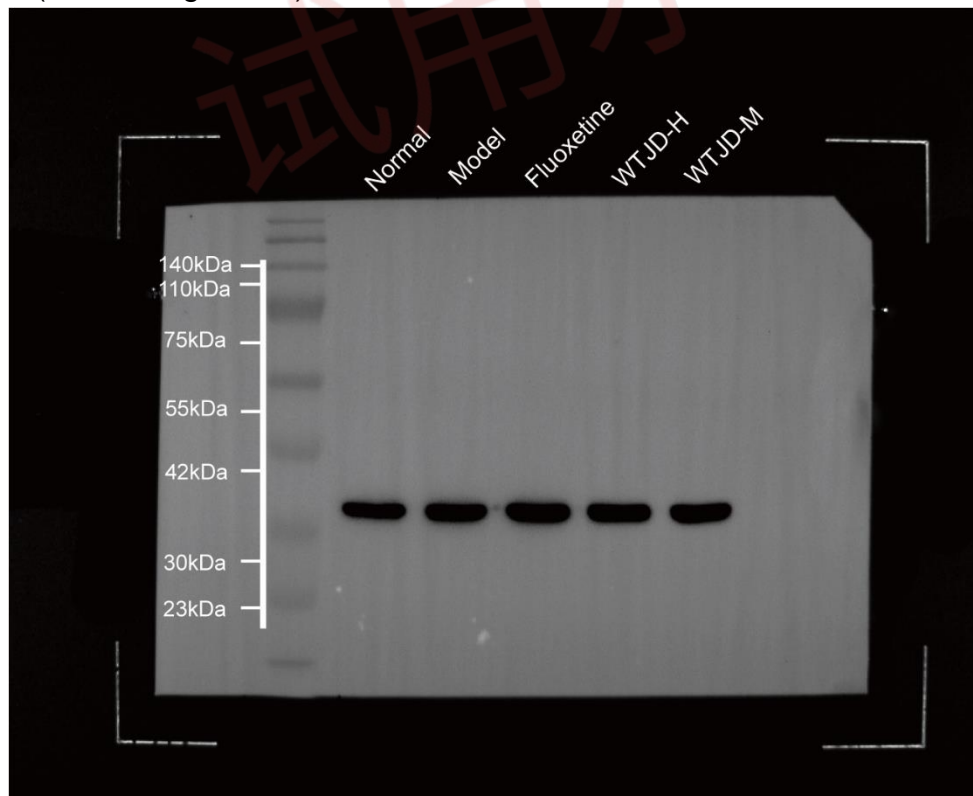

3.(For the Figure 5C)

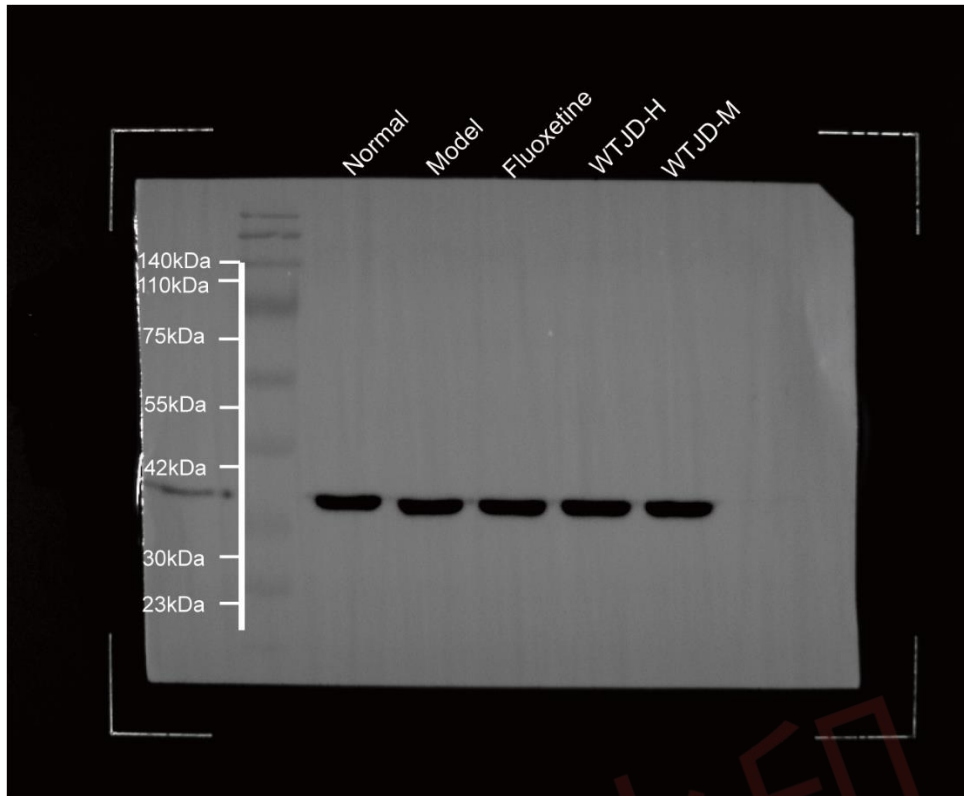

4.(For the Figure 5D)

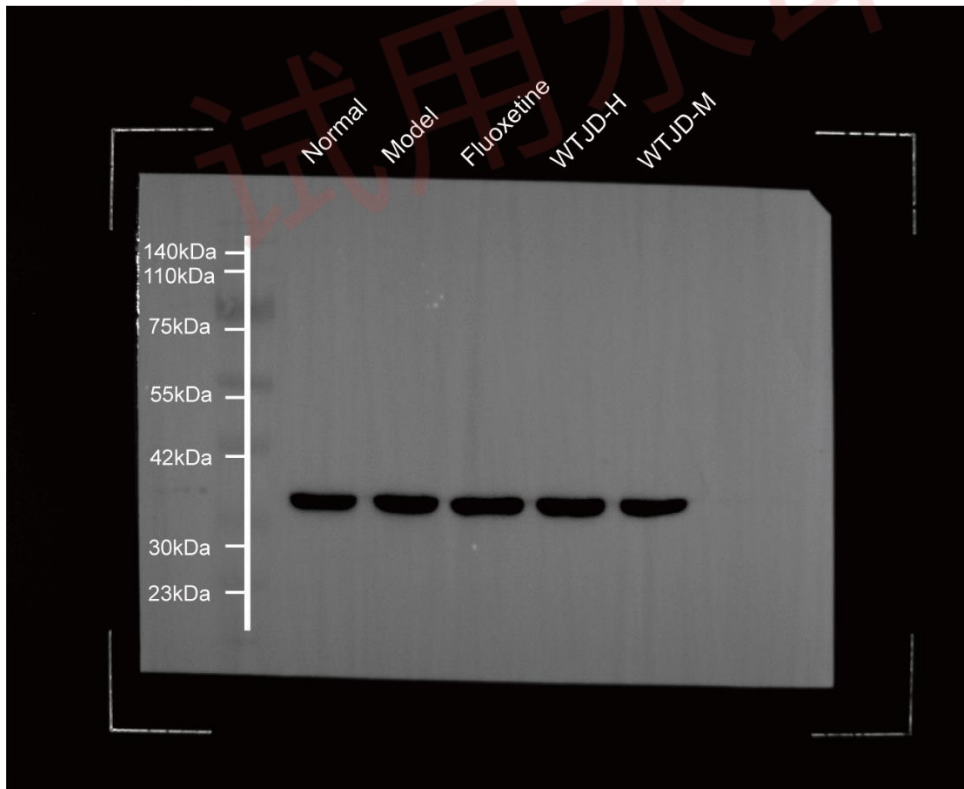

# ROR $\gamma$ t

1.(For the Figure 5)

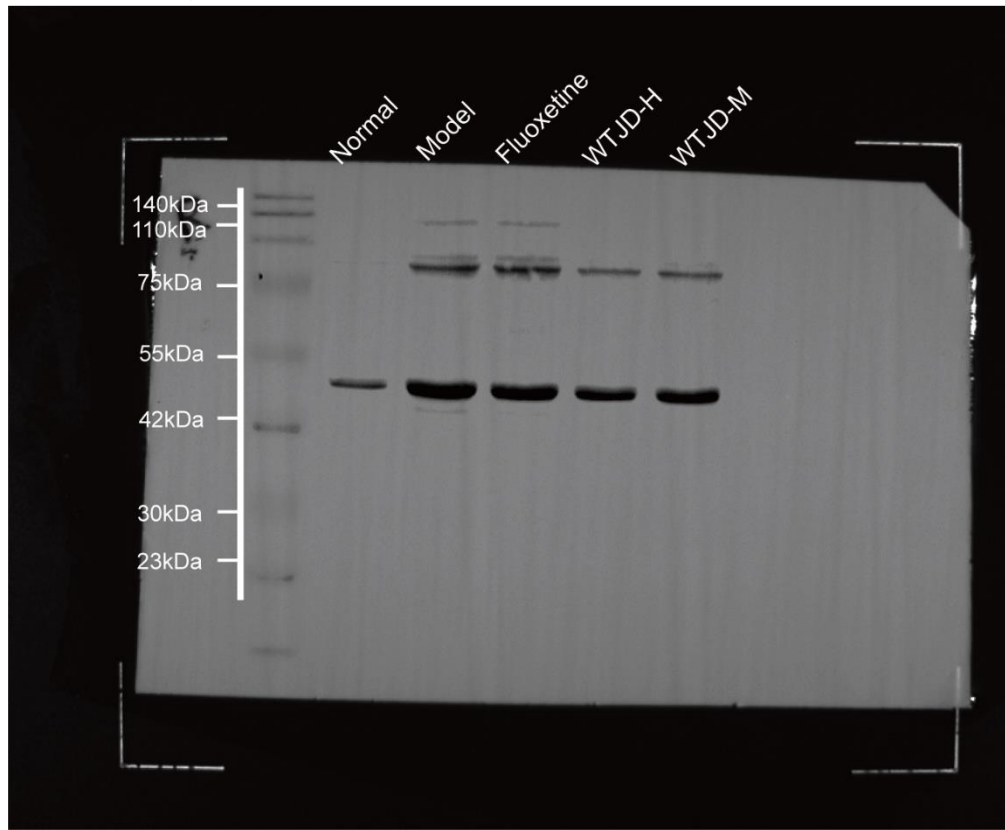

2.

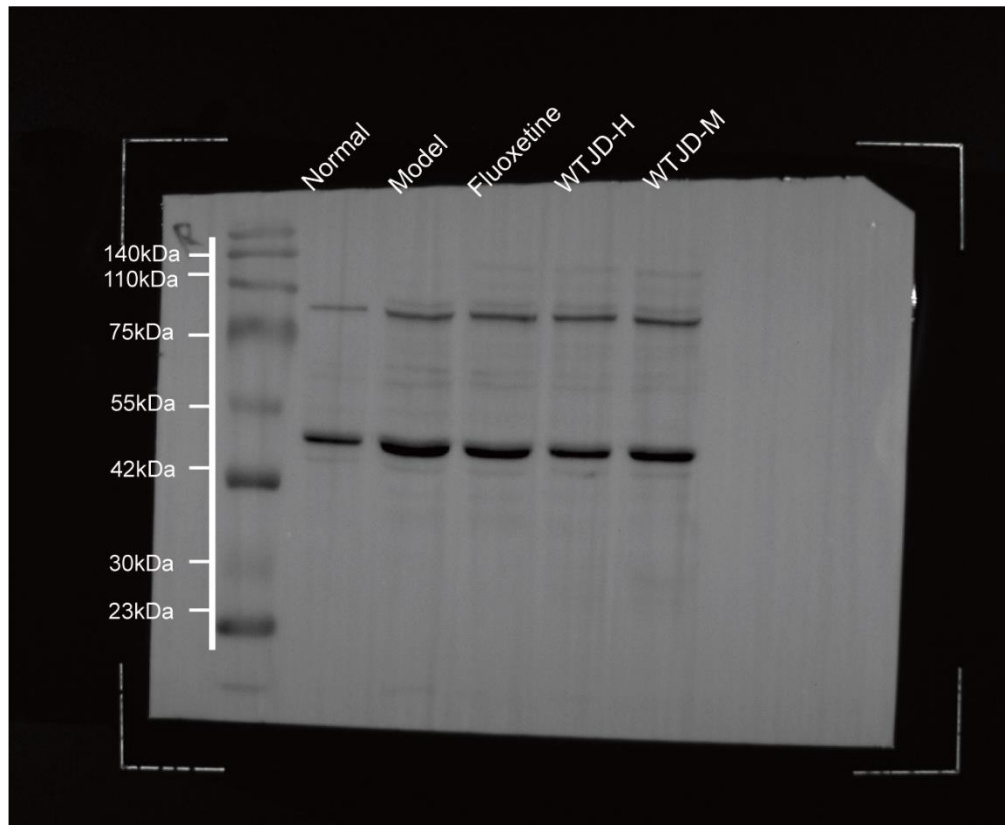



3.

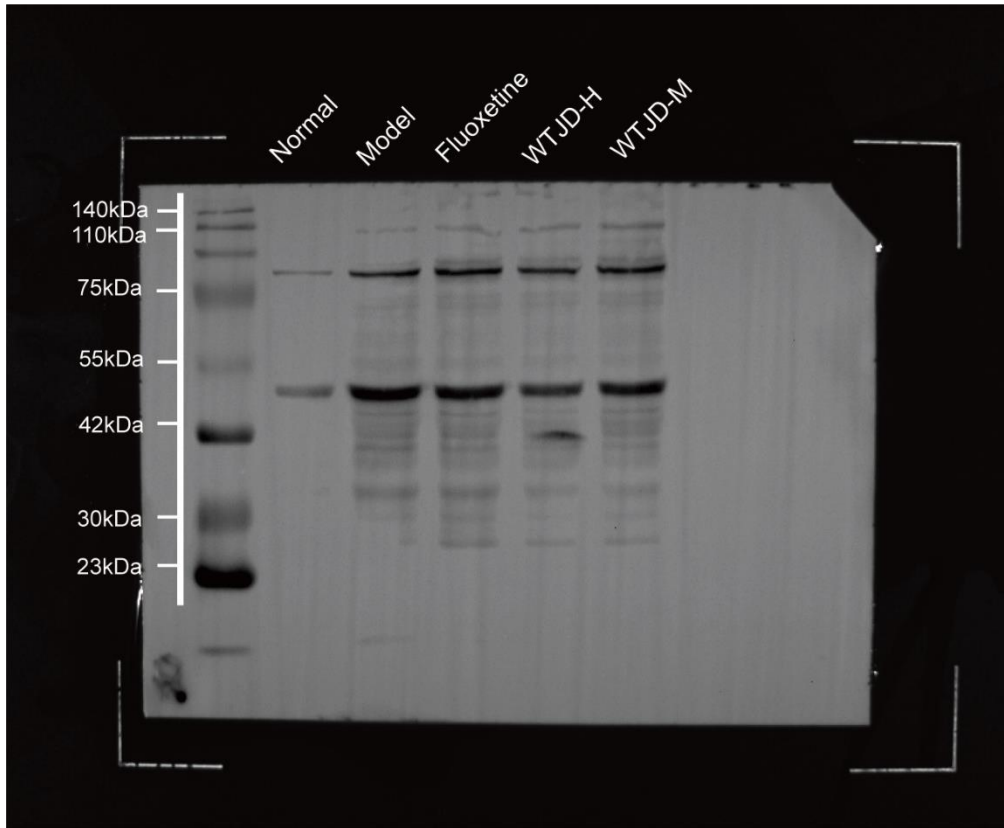

4.

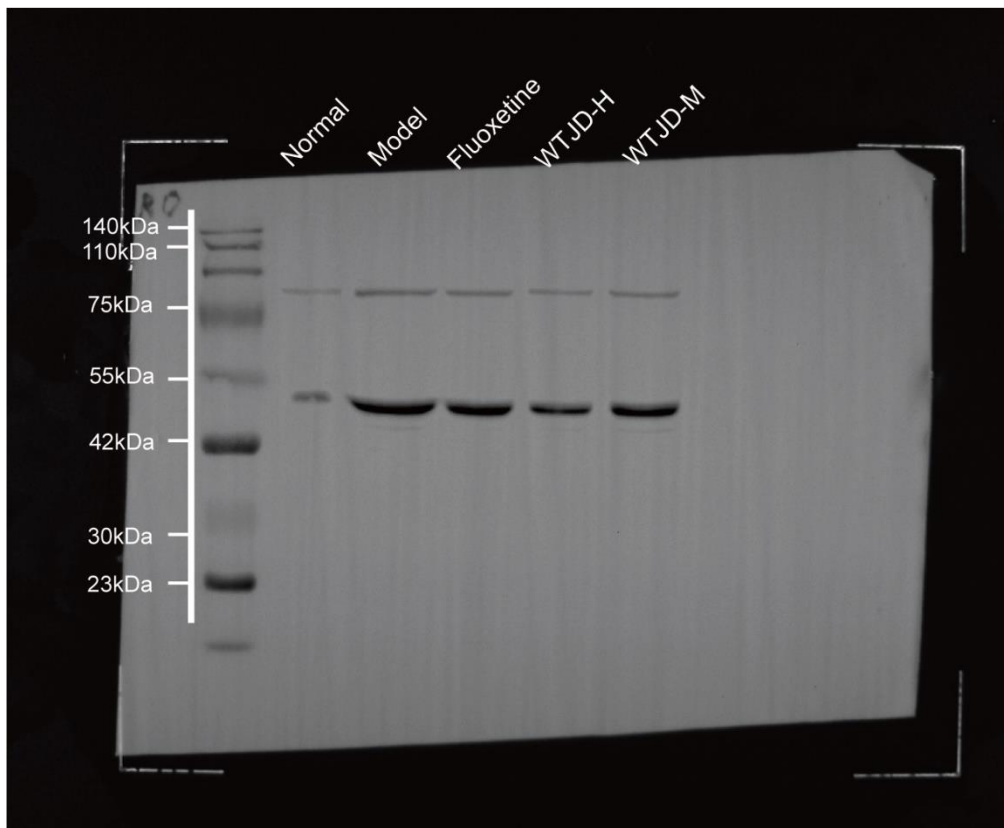

# Tbet

1.

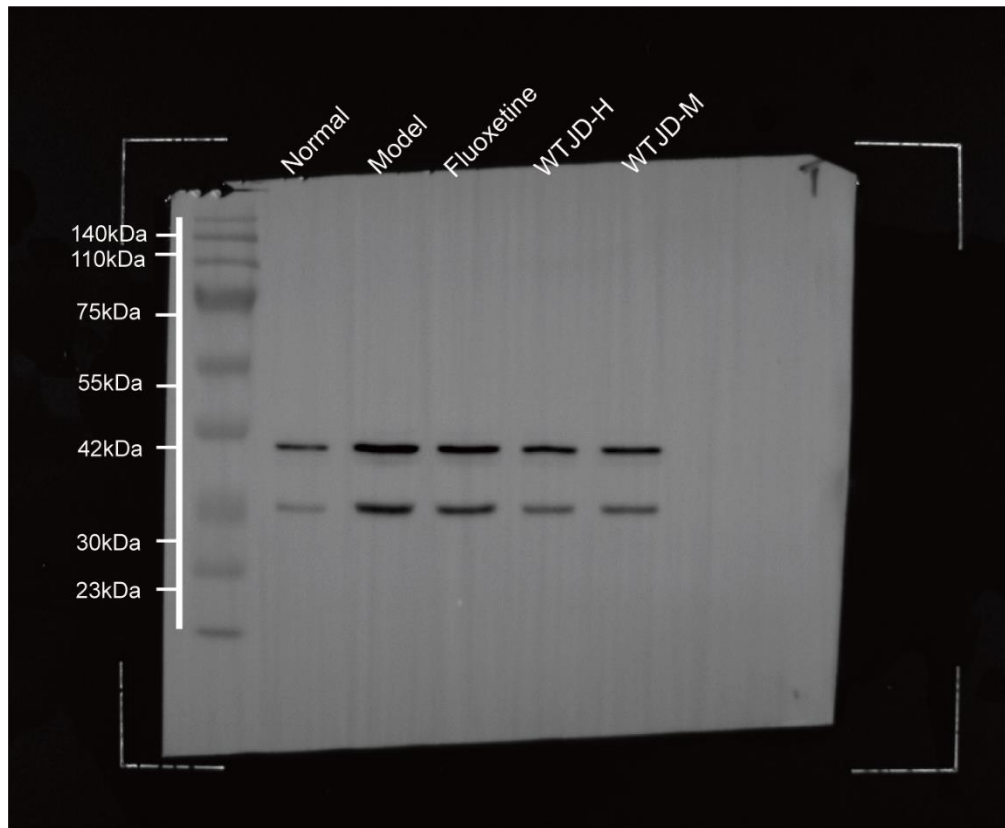

2.(For the Figure 5)

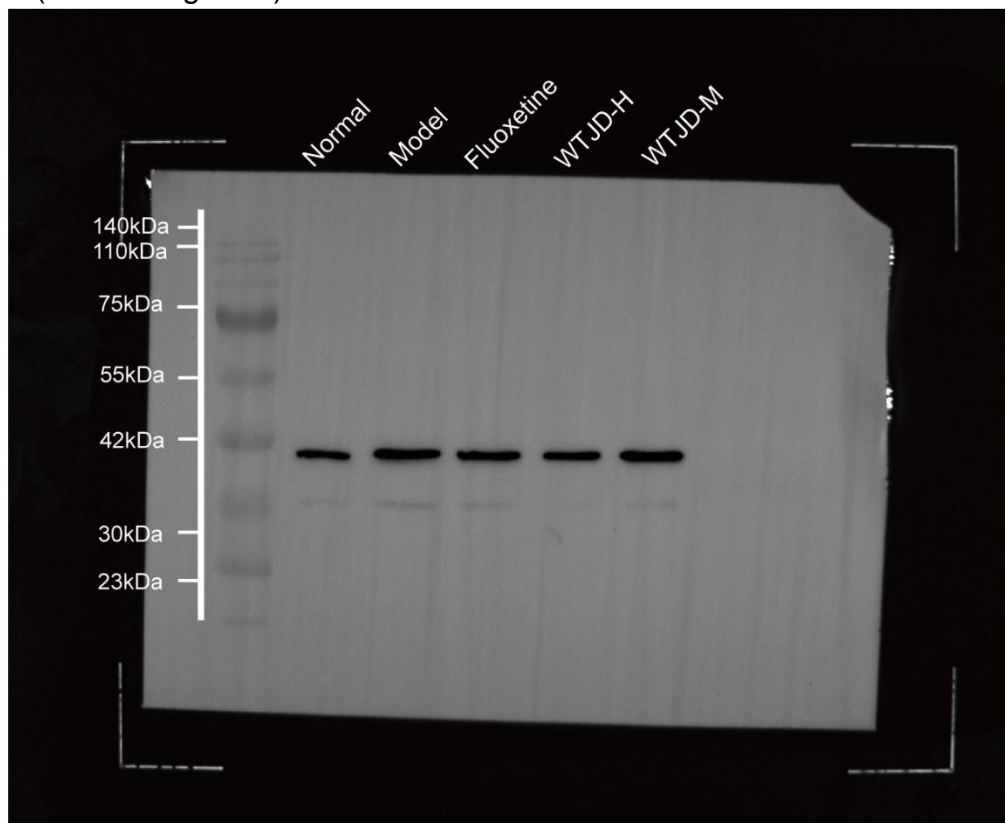

3.

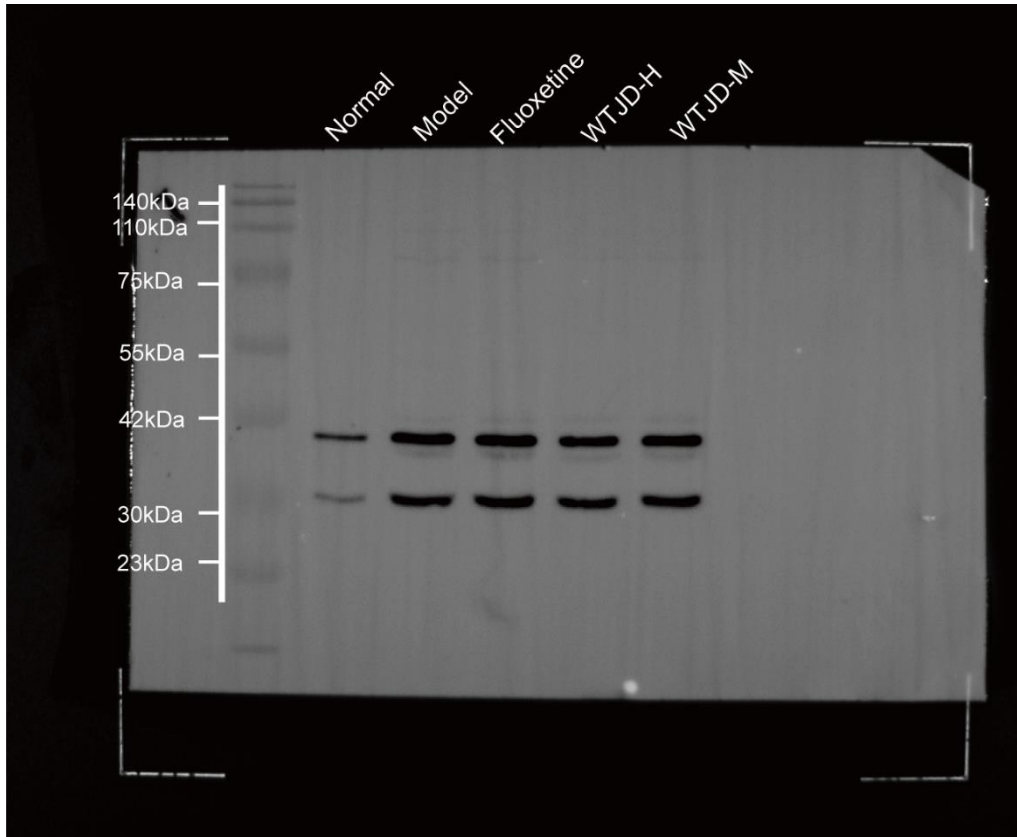

4.

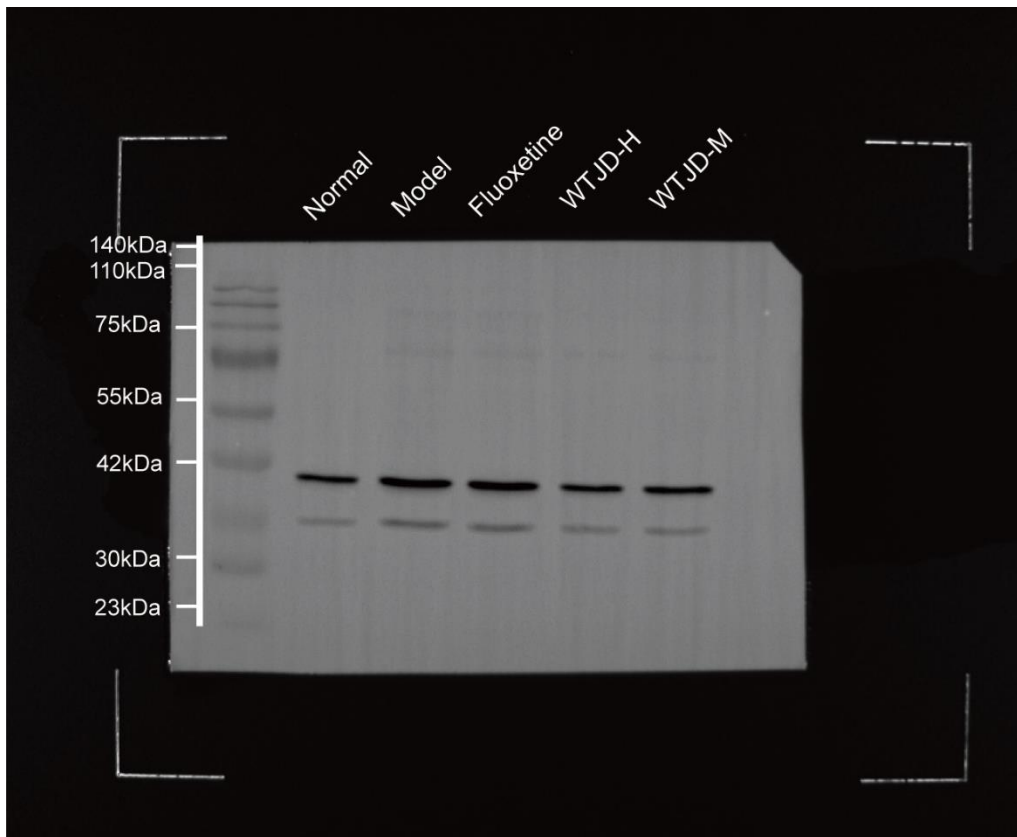

# GATA3

1.(For the Figure 5)

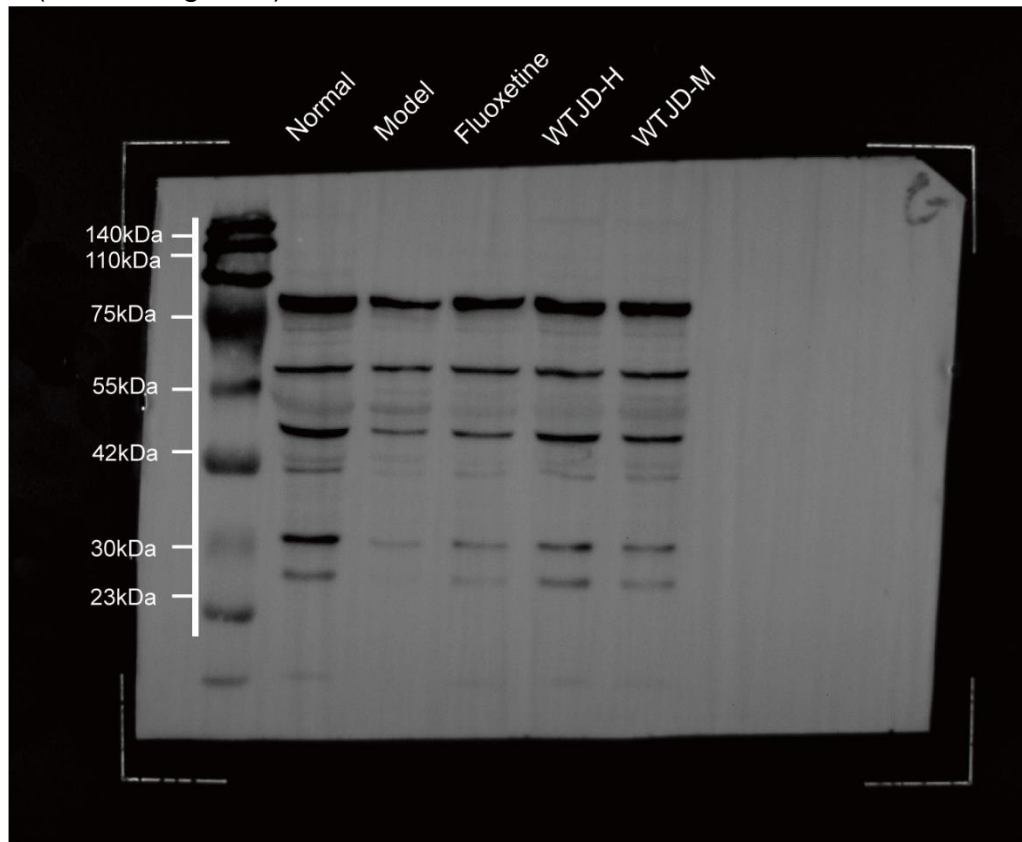

2.

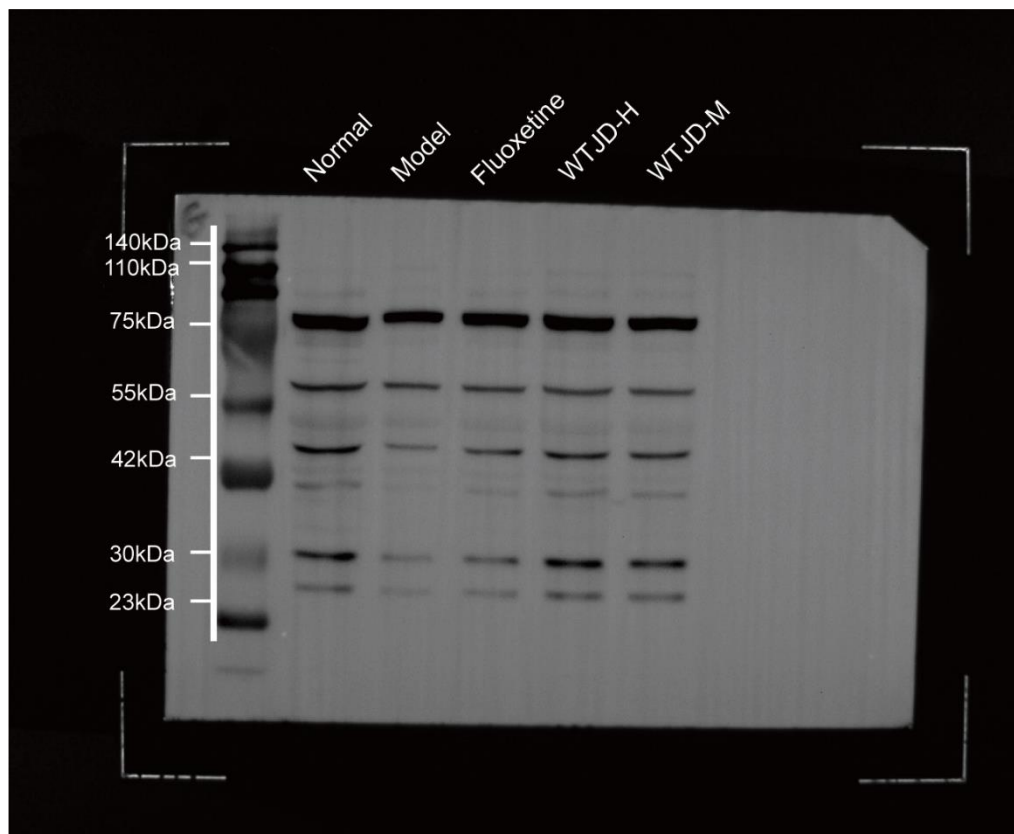

3.

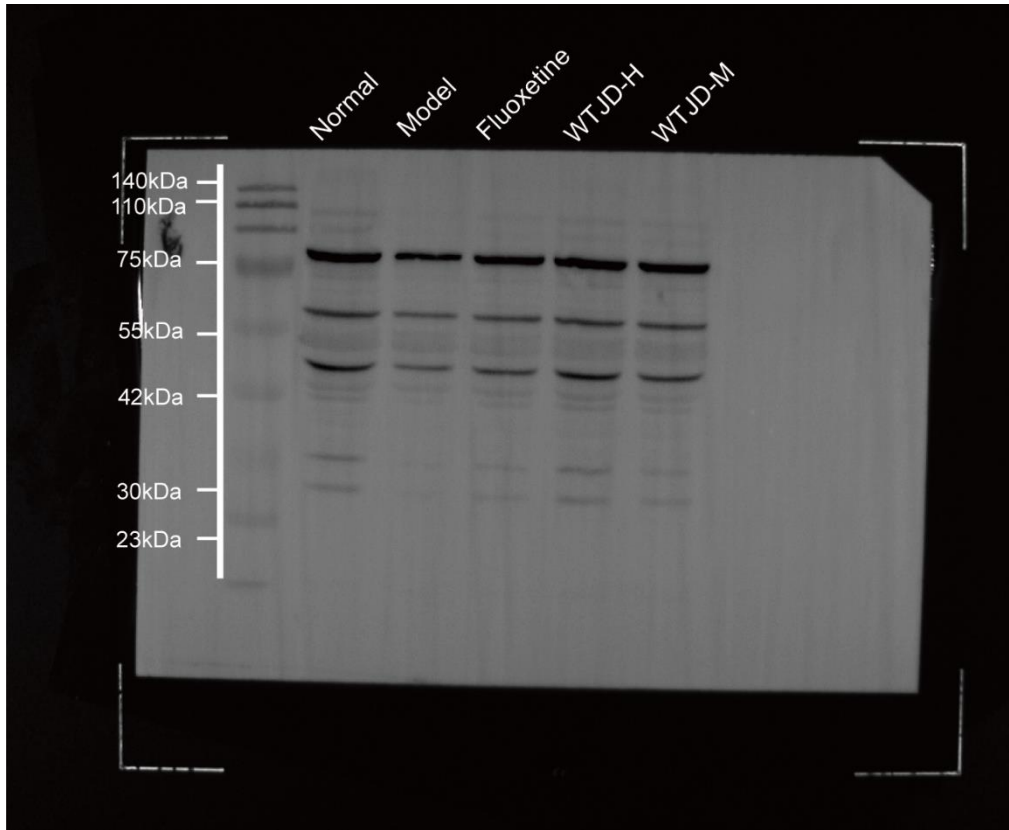

4.

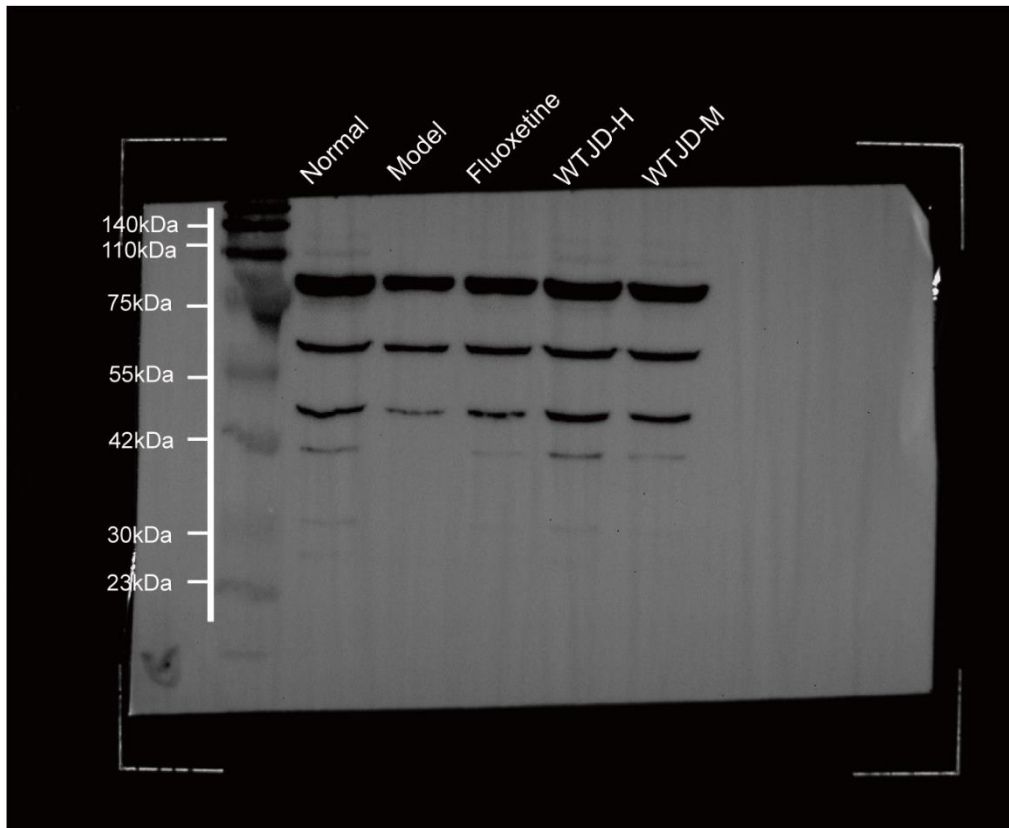

Supplement: Supplementary file 1 [file get_supplementary_file.php]
